# Supplementary material for: Analysis of Early-Life Growth and Age at Pubertal Onset in US Children
Source: PubMed Central journal article supplement (PMC8817204; doi:10.1001/jamanetworkopen.2021.46873), 2022-02-04
Supplement: jamanetwopen-e2146873-s002.pdf [file jamanetwopen-e2146873-s002.pdf]

\*Indicates required information. Only first name, last name, and suffix will appear in PubMed.

| <b>*Group Name(s): Program Collaborators for Environmental Influences on Child Health Outcomes</b> |                   |                              |                  |                                     |                                          |                                                         |                                                                                            |
|----------------------------------------------------------------------------------------------------|-------------------|------------------------------|------------------|-------------------------------------|------------------------------------------|---------------------------------------------------------|--------------------------------------------------------------------------------------------|
| <b>*First Name and Middle Initial(s)</b>                                                           | <b>*Last Name</b> | <b>*Suffix (eg, Jr, III)</b> | Academic Degrees | Institution                         | Location (city, state/province, country) | Role or Contribution, eg, chair, principal investigator | Group (if more than 1 Group listed in the byline and/or Subgroup (eg, Steering Committee)) |
| Akram                                                                                              | Alshawabkeh       |                              | PhD              | Northeastern University             | Boston, MA, USA                          | Principal Investigator                                  |                                                                                            |
| Judy                                                                                               | Aschner           |                              | MD               | Albert Einstein College of Medicine | Bronx, NY, USA                           | Principal Investigator                                  |                                                                                            |
| Clancy                                                                                             | Blair             |                              | PhD              | New York University                 | New York, NY, USA                        | Principal Investigator                                  |                                                                                            |
| Carlos                                                                                             | Camargo           | Jr                           | MD               | Massachusetts General Hospital      | Boston, MA, USA                          | Principal Investigator                                  |                                                                                            |
| Sean                                                                                               | Deoni             |                              | PhD              | Memorial Hospital of Rhode Island   | Pawtucket, RI, USA                       | Principal Investigator                                  |                                                                                            |
| Cristiane                                                                                          | Duarte            |                              | PhD              | Columbia University                 | New York, NY, USA                        | Principal Investigator                                  |                                                                                            |
| Anne                                                                                               | Dunlop            |                              | MD               | Emory University                    | Atlanta, GA, USA                         | Principal Investigator                                  |                                                                                            |
| Amy                                                                                                | Elliott           |                              | PhD              | University of Michigan              | Ann Arbor, MI, USA                       | Principal Investigator                                  |                                                                                            |
| Assiamira                                                                                          | Ferrara           |                              | MD               | Kaiser Permanente                   | Oakland, CA, USA                         | Principal Investigator                                  |                                                                                            |
| James                                                                                              | Gern              |                              | MD               | University of Wisconsin- Madison    | Madison, WI, USA                         | Principal Investigator                                  |                                                                                            |
| Carrie                                                                                             | Breton            |                              | ScD              | University of Southern California   | Los Angeles, CA, USA                     | Principal Investigator                                  |                                                                                            |
| Irva                                                                                               | Hertz-Picciotto   |                              | PhD              | University of California, Davis     | Davis, CA, USA                           | Principal Investigator                                  |                                                                                            |
| Alison                                                                                             | Hipwell           |                              | PhD              | University of Pittsburgh            | Pittsburgh, PA, USA                      | Principal Investigator                                  |                                                                                            |
| Margaret                                                                                           | Karagas           |                              | PhD              | Dartmouth College                   | Hanover, NH, USA                         | Principal Investigator                                  |                                                                                            |
| Catherine                                                                                          | Karr              |                              | MD, PhD          | University of Washington            | Seattle, WA, USA                         | Principal Investigator                                  |                                                                                            |

## Supplemental Online Content: Nonauthor Collaborators

\*Indicates required information. Only first name, last name, and suffix will appear in PubMed.

| *First Name and Middle Initial(s) | *Last Name  | *Suffix (eg, Jr, III) | Academic Degrees | Institution                              | Location (city, state/province, country) | Role or Contribution, eg, chair, principal investigator | Group (if more than 1 Group listed in the byline) and/or Subgroup (eg, Steering Committee) |
|-----------------------------------|-------------|-----------------------|------------------|------------------------------------------|------------------------------------------|---------------------------------------------------------|--------------------------------------------------------------------------------------------|
| Barry                             | Lester      |                       | PhD              | Women & Infants Hospital of Rhode Island | Providence, RI, USA                      | Principal Investigator                                  |                                                                                            |
| Leslie                            | Leve        |                       | PhD              | University of Oregon                     | Eugene, OR, USA                          | Principal Investigator                                  |                                                                                            |
| Johnnye                           | Lewis       |                       | PhD              | University of New Mexico                 | Albuquerque, NM, USA                     | Principal Investigator                                  |                                                                                            |
| Scott                             | Weiss       |                       | MD               | Brigham and Women's Hospital             | Boston, MA, USA                          | Principal Investigator                                  |                                                                                            |
| Cynthia                           | McEvoy      |                       | MD               | Oregon Health & Science University       | Portland, OR, USA                        | Principal Investigator                                  |                                                                                            |
| Craig                             | Newschaffer |                       | PhD              | Drexel University                        | Philadelphia, PA, USA                    | Principal Investigator                                  |                                                                                            |
| Thomas                            | O'Connor    |                       | PhD              | University of Rochester                  | Rochester, NY, USA                       | Principal Investigator                                  |                                                                                            |
| Jean                              | Kerver      |                       | PhD              | Michigan State University                | Lansing, MI, USA                         | Principal Investigator                                  |                                                                                            |
| Julie                             | Herbstman   |                       | PhD              | Columbia University                      | New York, NY, USA                        | Principal Investigator                                  |                                                                                            |
| Susan                             | Schantz     |                       | PhD              | University of Illinois                   | Urbana, IL, USA                          | Principal Investigator                                  |                                                                                            |
| Joseph                            | Stanford    |                       | MD               | University of Utah                       | Salt Lake City, UT, USA                  | Principal Investigator                                  |                                                                                            |
| Leonardo                          | Trasande    |                       | MD               | New York University                      | New York, NY, USA                        | Principal Investigator                                  |                                                                                            |
| Rosalind                          | Wright      |                       | MD               | Icahn School of Medicine at Mount Sinai  | New York, NY, USA                        | Principal Investigator                                  |                                                                                            |
